# Supplementary material for: Exergames in Older Adult Community Centers and Nursing Homes to Improve Balance and Minimize the Risk of Falls in Older Adults: A Systematic Review and Meta-Analysis
Source: MDPI journal article supplement (doi:10.3390/healthcare11131872), 2023-06-28
Supplement: s1 [file s1]

**Supplementary material 6: Assessing risk of bias in the non-randomized study**

| Study | Bias due to confounding | Bias in selection of participants into the study | Bias in classification of interventions | Bias due to deviations from intended interventions | Bias due to missing data | Bias in measurement of outcomes | Bias in selection of the reported result |
|-------|-------------------------|--------------------------------------------------|-----------------------------------------|----------------------------------------------------|--------------------------|---------------------------------|------------------------------------------|
| [1]   | Moderate risk of bias   | Low risk of bias                                 | Moderate risk of bias                   | Low risk of bias                                   | Low risk of bias         | Low risk of bias                | Moderate risk of bias                    |

**References:**

1. Batista, J.S.; Wibeling, L.M.; De Marchi, A.C.B.; Pasqualotti, A. Evaluation and Physiotherapeutic Intervention in Older with Deficit Balance through the Scale of Berg and Wii Balance Board Platform. *Fisioter. em Mov.* **2014**, 27, 21–28, doi:10.1590/0103-5150.027.001.ao02.
2. Sterne, J.A.; Hernán, M.A.; Reeves, B.C.; Savović, J.; Berkman, N.D.; Viswanathan, M.; Henry, D.; Altman, D.G.; Ansari, M.T.; Boutron, I.; et al. ROBINS-I: A Tool for Assessing Risk of Bias in Non-Randomised Studies of Interventions. *BMJ* **2016**, i4919, doi:10.1136/bmj.i4919.
