# Supplementary material for: Exergames in Older Adult Community Centers and Nursing Homes to Improve Balance and Minimize the Risk of Falls in Older Adults: A Systematic Review and Meta-Analysis
Source: Healthcare (Basel). 2023 Jun 28;11(13):1872. doi: 10.3390/healthcare11131872 (PMC10341223; doi:10.3390/healthcare11131872)
Supplement: Supplementary file 1 [file healthcare-11-01872-s001.zip]

Archive with 6 entries (6 files):
- Supplementary material 1.pdf
- Supplementary material 2.pdf
- Supplementary material 3.pdf
- Supplementary material 5.pdf
- Supplementary material 6 -.pdf
- Supplementary Material S4 - updated.pdf
